1  
2  
3  
4  
5  
6  
7  
8  
9  
10  
11  
12  
13  
14  
15  
16  
17  
18  
19  
20  
21  
22  
23  
24  
25

Recombinant adenovirus causes prolonged mobilization of macrophages in the anterior chamber of mice

Kacie J. Meyer<sup>1</sup>, Danielle Pellack<sup>1</sup>, Adam Hedberg-Buenz<sup>1,2</sup>, Nicholas Pomernackas<sup>1</sup>, Dana Soukup<sup>1</sup>, Kai Wang<sup>3</sup>, John H. Fingert<sup>4</sup>, and Michael G. Anderson<sup>1,2,4</sup>

<sup>1</sup>Department of Molecular Physiology and Biophysics, University of Iowa, Iowa City, IA; <sup>2</sup>VA Center for the Prevention and Treatment of Visual Loss, Iowa City VA Health Care System, Iowa City, IA; Department of Biostatistics, University of Iowa, Iowa City, IA; <sup>2</sup>Department of Ophthalmology and Visual Sciences, University of Iowa, Iowa City, IA

Correspondence to: Michael G. Anderson, Department of Molecular Physiology and Biophysics, 3123 Medical Education and Research Facility, 375 Newton Road, Iowa City, IA 52242, Phone (319) 335-7839; email: michael-g-anderson@uiowa.edu

The authors have no conflicts-of-interest or financial disclosures.

26 **ABSTRACT**

27

28 Purpose: Ocular tissues of mice have been studied in many ways using replication deficient  
29 species C type 5 adenoviruses (Ad5) as tools for manipulating gene expression. While  
30 refinements to injection protocols and tropism have led to several advances in targeting cells of  
31 interest, there remains a relative lack of information concerning how Ad5 may influence other  
32 ocular cell types capable of confounding experimental interpretation. Here, a slit-lamp is used to  
33 thoroughly photodocument the sequelae of intraocular Ad5 injections over time in mice, with  
34 attention to potentially confounding indices of inflammation.

35

36 Methods: A cohort of C57BL/6J mice was randomly split into 3 groups (Virus, receiving  
37 unilateral intracameral injection with  $5 \times 10^7$  pfu of a cargo-less Ad5 construct; Saline, receiving  
38 unilateral balanced salt solution injection; and Naïve, receiving no injections). From this initial  
39 experiment, a total of 52 eyes from 26 mice were photodocumented via slit-lamp at four time  
40 points (baseline, 1, 3, and 10 weeks following initiation of the experiment) by an observer  
41 masked to treatments and other parameters of the experimental design. Following the last in  
42 vivo exam, tissues were collected. Based on the slit-lamp data, tissues were studied via  
43 immunostaining with the macrophage marker F4/80. Subsequently, three iterations of the  
44 original experiment were performed with otherwise identical experimental parameters testing the  
45 effect of age, intravitreal injection, and A195 buffer, adding slit-lamp photodocumentation of an  
46 additional 32 eyes from 16 mice.

47

48 Results: The masked investigator was able to use the sequential images from each mouse in  
49 the initial experiment to assign each mouse into its correct treatment group with near perfect  
50 fidelity. Virus injected eyes were characterized by corneal damage indicative of intraocular  
51 injection and a prolonged mobilization of clump cells on the surface of the iris. Saline injected

52 eyes had only transient corneal opacities indicative of intraocular injections, and Naïve eyes  
53 remained normal. Immunostaining with F4/80 was consistent with ascribing the clump cells  
54 visualized via slit-lamp imaging as a type of macrophage. Experimental iterations using Ad5  
55 indicate that all virus injected eyes had the distinguishing feature of a prolonged presence of  
56 clump cells on the surface of the iris regardless of injection site. Mice receiving an intraocular  
57 injection of Ad5 at an advanced age displayed a protracted course of corneal cloudiness that  
58 prevented detailed visualization of the iris at the last time point.

59

60 Conclusions: Because the eye is often considered an “immune privileged site”, we suspect that  
61 several studies have neglected to consider that the presence of Ad5 in the eye might evoke  
62 strong reactions from the innate immune system. Ad5 injection caused a sustained mobilization  
63 of clump cells, i.e. macrophages. This change is likely a consequence of either direct  
64 macrophage transduction or a secondary response to cytokines produced locally by other  
65 transduced cells. Regardless of how these cells were altered, the important implication is that  
66 the adenovirus led to long lasting changes in the environment of the anterior chamber. Thus,  
67 these findings describe a caveat of Ad5-mediated studies involving macrophage mobilization,  
68 which we encourage groups to use as a bioassay in their experiments and consider in  
69 interpretation of their ongoing experiments using adenoviruses.

70

71 **INTRODUCTION**

72

73           Recombinant adenoviruses have many advantages—and some notable  
74 disadvantages—for application as gene transfer vehicles [1-4]. One reason that adenoviruses  
75 were initially developed for gene transfer is that a great deal of their basic biology has long been  
76 well understood [5]. All adenoviruses are non-enveloped double stranded DNA viruses with a  
77 linear double-stranded genome encased along with core proteins into an icosahedral capsid [6].  
78 Adenoviruses can be classified into seven species (A-G), with multiple serotypes per sub-group  
79 [7]. In humans, adenovirus infection is typically mild, with the notable exception of  
80 immunocompromised patients, for which it can be life-threatening. To promote safety of  
81 recombinant adenoviruses used in laboratories, the E1 region of the adenoviral genome is  
82 typically deleted, rendering the virus replication incompetent and creating a location for insertion  
83 of transgene cassettes [8]. Recombinant adenoviruses typically have broad tropism, high  
84 efficiency of gene delivery, and can transduce both dividing and quiescent cell populations.  
85 Upon entry into the nucleus, adenovirus can initiate gene transcription without integrating into  
86 the host genome, circumventing problematic insertional mutagenesis. Replication deficient  
87 species C type 5 (Ad5) was among the first vectors of this type studied, and following the  
88 refinement of protocols for its efficient production [9, 10], has grown in popularity to become one  
89 of the most popular gene transfer tools used in research.

90

91           Ocular tissues of mice have been studied in many ways with Ad5 [11, 12]. Most studies  
92 using Ad5 have desired transduction of two ocular tissues, retinal photoreceptors in the  
93 posterior segment and trabecular meshwork cells in the anterior segment. In both cases,  
94 effective transfer to these cell-types is challenged by the high transduction efficiencies of  
95 neighboring tissues. For the retina, retinal pigmented epithelium and Muller cells tend to be  
96 more readily transduced than photoreceptors [11], and in the case of the anterior chamber,

97 corneal endothelium tends to be transduced more than trabecular meshwork cells [13].  
98 Transduction with replication-deficient adenoviruses is transient, with Ad5-driven reporter  
99 expression typically described as lasting a period of 2–7 weeks following intraocular injections  
100 [13-15]—which can be extended with use of anti-inflammatory treatments [14]. Refinements to  
101 injection protocols [16] and tropism [17, 18] continue to improve apparent outcomes, though  
102 with more success for transfer to trabecular meshwork cells than for photoreceptors. While the  
103 efficiency of transfer to desired cell-types is important, it is equally important to consider how to  
104 prevent Ad5 from influencing unwanted cell-types, especially cells of the immune system. While  
105 some progress in averting adenoviral immune responses has been made in other tissues [1],  
106 less has been studied or attempted in the eye [14].

107

108         Here, we used slit-lamp imaging to describe the consequences of intraocular Ad5  
109 injection in healthy C57BL/6J mice that were photodocumented at 4 time points (baseline, 1, 3,  
110 and 10 weeks following initiation of the experiment). We were led to conduct this study in a  
111 comprehensive fashion following sporadic observations from pilot experiments indicating that  
112 Ad5 injected eyes had adverse reactions in the anterior chamber that were more common and  
113 severe than suggested by the existing literature—which has largely been based on histologic  
114 sampling. Our slit-lamp data indicate a highly predictable response involving corneal opacity,  
115 which resolves, and a prolonged mobilization of clump cells on the surface of the iris, which did  
116 not resolve up to the oldest time points examined. These long-lived changes to macrophages of  
117 the anterior chamber could have a confounding influence in studies using adenoviral vectors  
118 and we suggest that future experiments should include screening for them as part of their  
119 experimental design.

120

## 121 **METHODS**

122

123 Experimental animals

124

125 All experiments were performed at the University of Iowa, conducted in accordance with  
126 the Association for Research in Vision and Ophthalmology Statement for the Use of Animals in  
127 Ophthalmic and Vision Research, and approved by the Institutional Animal Care Use and  
128 Committee of the University of Iowa. C57BL/6J mice were obtained from The Jackson  
129 Laboratory (Stock 000664; Bar Harbor, ME, USA) and subsequently bred and housed at the  
130 University of Iowa Research Animal Facility.

131

132 Slit-lamp examination

133

134 Slit-lamp examination and photo documentation were performed by MGA (masked to  
135 treatment for the entire course of the study) at baseline (3 days prior to when some eyes  
136 received injections), and 1, 3, and 10 weeks following initiation of the experiment. Anterior  
137 chamber phenotypes were assessed in conscious mice, using a slit-lamp at 25X and 40X  
138 magnifications (SL-D7; Topcon, Tokyo, Japan), and photodocumented using a digital camera  
139 (D800; Nikon, Tokyo, Japan). All photographs were taken with identical slit-lamp settings and  
140 documented using identical camera settings and image processing. Following the final exam,  
141 eyes were grouped by MGA (still masked to treatment) based on common ocular phenotypes.

142

143 Adenovirus injection

144

145 A cargo-less Ad5 stock construct was purchased from the University of Iowa Viral Vector  
146 Core (Ad5CMVempty; Catalog #: VVC-U of Iowa-272, Iowa City, IA, USA). The University of  
147 Iowa Viral Vector Core purifies adenoviral vectors by standard ultracentrifugation using a double  
148 cesium chloride step gradient and dialyzes extensively against A195 formulation buffer [19].

149 Mice with normal slit-lamp examinations at baseline were randomly divided into sex-  
150 matched groups: 1) Virus mice (N=11) had one eye injected intracamerally with  $5 \times 10^7$  pfu of  
151 Ad5CMVempty and one eye remaining naïve; 2) Saline mice (N=11) had one eye injected  
152 intracamerally with balanced salt solution (BSS; Alcon Laboratories, Fort Worth, TX, USA) and  
153 one eye remaining naïve; and 3) Naïve mice (N=5) did not receive an injection in either eye but  
154 were otherwise treated identically to the other groups. Treatments were randomized between  
155 right and left eyes. One mouse from the Saline cohort died during the study. To test iterations of  
156 the original experiment, a second cohort of mice with normal slit-lamp examinations at baseline  
157 were randomly divided into sex-matched groups: 1) Virus mice (N=4) had one eye injected  
158 intracamerally with  $5 \times 10^7$  pfu of Ad5CMVempty and one eye remaining naïve, identical to “Virus  
159 mice” in the original experiment; 2) Buffer mice (N=4) had one eye injected intracamerally with  
160 A195 Buffer provided by the University of Iowa Viral Vector Core and one eye remaining naïve;  
161 3) Intravitreal mice (N=4) had one eye injected intravitreally with  $5 \times 10^7$  pfu of Ad5CMVempty  
162 and one eye remaining naïve; and 4) Aged mice (N=4) had one eye injected with  $5 \times 10^7$  pfu of  
163 Ad5CMVempty and one eye remaining naïve; three eyes in this group received intracameral  
164 injections and one eye received an intravitreal injection.

165  
166 For injections, mice were anesthetized with a mixture of 87.5 mg/kg ketamine  
167 (VetaKet®, AKORN, Lake Forest, IL, USA) and 12.5 mg/kg xylazine (Anased, Lloyd  
168 Laboratories®, Shenandoah, IA, USA). All eyes were dilated with 2% cyclopentolate eye drops  
169 (Alcon Laboratories, Inc., Fort Worth, TX, USA). Upon full anesthesia, 0.5% proparacaine eye  
170 drops (Bausch & Lomb, Rochester, NY, USA) were applied to all eyes to provide additional local  
171 anesthesia. For each eye designated to receive an intracameral injection, the cornea was first  
172 punctured using a 33G needle and the aqueous humor allowed to drain from the anterior  
173 chamber. Treatment was delivered as a 2.0  $\mu$ l intracameral injection using a 30G needle with  
174 reentry via the initial puncture site. For each eye designated to receive an intravitreal injection,

175 the eye was punctured slightly posterior to the limbus using a 33G needle. Treatment was  
176 delivered as a 2.0 µl intravitreal injection using a 30G needle with reentry via the initial puncture  
177 site. For recovery, all mice received artificial tear ointment in both eyes (AKORN Animal Health,  
178 Inc., Lake Forest, IL, USA), an injection of 1 mg/kg antisedan (Zoetis, Inc.; Kalamazoo, MI,  
179 USA), and exogenous warmth.

180

## 181 Histochemistry

182

183 Mice were euthanized by carbon dioxide inhalation followed by cervical spine  
184 dislocation. Eyes were collected, fixed in 4% paraformaldehyde in 1X phosphate buffered saline  
185 (PBS) for 4 h at 4°C with agitation. Anterior cups were rinsed in PBS, cryoprotected in  
186 increasing concentrations of sucrose solutions in PBS (5 to 30%), embedded in a mixture of two  
187 parts 30% sucrose and one part Optimal Cutting Temperature compound (Tissue-Tek®; Sakura  
188 Finetek USA, Inc.; Torrance, CA, USA), and cut in 7 µm sagittal cryosections using a cryostat.  
189 Cryosections underwent either histochemical or immunohistochemical staining. For the  
190 histochemical staining, slides were stained with hematoxylin and eosin using standard methods  
191 and imaged by light microscopy (BX52 equipped with a DP72 camera; Olympus) using identical  
192 settings. For immunohistochemical staining, cryosections were blocked in 1% bovine serum  
193 albumin in PBS, incubated with primary antibody (monoclonal rat anti-F4/80, 1:200 dilution,  
194 MCA497; BIO-RAD; Hercules, CA, USA) for one hour, rinsed, and incubated with secondary  
195 antibody (conjugated goat anti-rat Alexa fluoro 546, 1:1,000 dilution, A11081; Invitrogen by  
196 ThermoFisher Scientific; Waltham, MA, USA) for 30 minutes, all of which were done at room  
197 temperature. Both antibodies were diluted in antibody diluent (IHC-Tek™; IHC WORLD, LLC;  
198 Ellicott City, MD, USA). Samples were rinsed, counterstained with DAPI, and imaged at 200X  
199 magnification by confocal microscopy (DM2500 SPE; Leica Microsystems, Inc.; Buffalo Grove,  
200 IL, USA) and dark field light microscopy using identical settings.



201

## 202 **RESULTS**

203

204 Cohort generation

205

206 To study the consequences of adenovirus following ocular injection, we used a slit-lamp

207 to document the anterior chamber over time following Ad5 injection into the anterior chamber.

208 To collect baseline data, we first imaged 29 naïve C57BL/6J mice (male N=11; female N=18) at

209 12.5 weeks of age. Consistent with previous reports on sporadic ocular abnormalities in C57BL

210 mouse strains [20], 2 of 58 eyes were found to be microphthalmic, leading to 2 mice being

211 excluded from further study. At 13 weeks of age, remaining mice (male N=11; female N=16)

212 were randomly assigned to one of three treatment groups: Virus, Saline, or Naïve. Mice in the

213 Virus group had one eye injected with Ad5CMVempty and the other eye remained naïve. Mice

214 in the Saline group served as a control for ocular injection of a fluid, with one eye injected with

215 BSS and the other eye remaining naïve. Both eyes of mice in the Naïve group remained naïve;

216 they otherwise received identical treatment to the experimental animals. In mice receiving

217 injections, treatment was randomized between left and right eyes.

218

219 Our initial study design was to have at least 10 mice in the Virus and Saline groups, and

220 5 mice in the Naïve group; to exclude any mice with obvious initial complications from the

221 injection; to expect some attrition during aging; and to not exclude any mice meeting criteria,

222 which might result in cohorts with greater than 10 mice. There were no obvious complications

223 with injections and one mouse in the Saline group died early in the course of the study. Thus,

224 the final number of mice in each group available for the masked study were: Virus (N=11),

225 Saline (N=10), and Naïve N=5).

226

227 Slit-lamp examinations

228

229           A masked investigator examined and photodocumented all eyes (N=52) at the 1-, 3-,  
230 and 10-week time points. The entirety of this data set (208 images at 25X and 52 images at  
231 40X) is available in Appendix 1–8. Following completion, the masked investigator used the four  
232 sequential image pairs from each mouse to assign mice into similar groupings based on  
233 common ocular phenotypes. Three mice were not able to be categorized because each had one  
234 eye that appeared to have been manipulated but exhibited severe corneal opacity that  
235 prevented imaging of any other anterior chamber structures. In these eyes, which were opaque  
236 throughout the entirety of the study, it was not possible to discern whether they were mice that  
237 had inadvertent damage from the injection procedures or mice that had severe reactions to the  
238 materials injected (Appendix 1-2). The remaining mice could be grouped into one of three  
239 groups with common presentations.

240

241           Group 1 (N=8) was characterized by one normal appearing eye, and one eye indicative  
242 of intraocular injection and inflammation (Figure 1, Appendix 3-4). Eyes in this group had small  
243 corneal opacities at 1 week, which typically worsened (larger and more opaque) through 3  
244 weeks and resolved to various degrees by 10 weeks. Affected eyes sometimes had small  
245 lenticular opacities. Most notably, and completely unique to this group, all the affected eyes in  
246 this group had irides with focally “rough” appearing surfaces. When the iris could be observed  
247 through the cloudy cornea, rough appearing irides were visible in some eyes at the 3-week time  
248 point and were present in all eyes at the 10-week time point. These changes were evident with  
249 the aid and magnification of a slit-lamp, but imperceptible to the naked eye. Upon closer  
250 examination, these areas were due to clusters of clump cells on the surface of the iris—cells  
251 identical to those we have previously observed in mice with iris diseases [21, 22], and  
252 resembling reports of similar macrophage-like cells of the iris that have been described by  
253 others [23-25]. Clump cells have a characteristic small round shape, which is best noted if

254 observed via slit-lamp with an extreme angle with respect to the light source, in which their  
255 location on the surface of the iris is evident from the small crescent shadow they cast on the  
256 surface. Aged mice with normal eyes will sometimes have 1–2 spots where these cells are  
257 clearly present or suspected [22], but this will not give the iris a rough appearance. Thus, the  
258 rough appearing iris and striking accumulation of these clump cells was a clear indication of a  
259 shared aberration among affected eyes of this group.

260

261 Among the other groups, Group 2 (N=9 mice) was characterized by one eye with a  
262 normal appearance and one eye with mild focal corneal cloudiness at the 1-week time point,  
263 which resolved at later, and sometimes with small focal lenticular opacities in the same eye,  
264 which did not resolve (Figure 2, Appendix 5-6). Group 3 (N=6 mice) was characterized by both  
265 eyes with a consistently normal appearance (Figure 3, Appendix 7-8).

266

267 At completion, the masked observer (who was masked to treatment and the precise  
268 number of mice per group) assigned Group 1 to Virus, Group 2 to Saline, and Group 3 to Naïve.  
269 After unmasking, all 8 eyes predicted to be in the Virus group were accurately assigned. There  
270 was 1 mismatch among the controls, in which a mouse in the Saline group was inaccurately  
271 predicted to be in the Naïve group. There is a significant association between the predicted  
272 treatment groups and the true treatment groups ( $P=4.08E-9$ ; True Group N=8:10:5  
273 [Virus:Saline:Naïve] vs. Predicted Group N=8:9:6 [Virus:Saline:Naïve]; Fisher's Exact Test). All  
274 3 of the non-categorized mice with severe corneal opacity were in the Virus group.

275

276 Appearance and immunostaining of clump cells

277

278 The most uniquely distinguishing feature between groups was the prolonged presence of clump  
279 cells on the surface of the iris (Figure 4). Clump cells are typically considered to be a type of  
280 macrophage [23, 24]. To confirm that the cells we have observed responding to Ad5 share  
281 features of macrophages, we performed immunostaining with the macrophage marker F4/80  
282 [26, 27] (Figure 5) and H&E histochemical staining (Supplementary Figure 1). Small round  
283 F4/80-positive cells on top of the iris stroma, the same location as we observed the clump cells  
284 by slit-lamp, were uniquely visible in most, but not all, sections of eyes from the Virus group.  
285 F4/80-positive cells were additionally observed within the ciliary body and deep within the  
286 iridocorneal angle of eyes from the Virus group.

287

288 Testing experimental iterations

289

290 To study the effect of commonly used iterations of experiments involving Ad5 ocular  
291 injection, we used a slit-lamp to document the anterior chamber over time of a second cohort of  
292 C57BL/6J mice. To collect baseline data, we first imaged 12 naïve C57BL/6J mice (male N=6;  
293 female N=6) at 12.5 weeks of age and 4 naïve C57BL/6J mice (male N=2; female N=2) at 23.5  
294 weeks of age. No mice in this cohort were excluded from further study. At 13 weeks of age and  
295 24 weeks of age, respectively, mice were randomly assigned to one of four treatment groups  
296 with treatment randomized between left and right eyes: Virus, Buffer, Buffer, or Aged. Mice in  
297 the Virus group had treatment identical to the “Virus” group in the original experiment, having  
298 one eye injected intracamerally with Ad5CMVempty and the other eye remaining naïve, and  
299 serve as a positive control. Mice in the Buffer group had one eye injected intracamerally with  
300 A195 Buffer, a common Adenovirus vehicle, and the other eye remained naïve. Mice in the  
301 Intravitreal group had one eye injected intravitreally with Ad5CMVempty and the other eye  
302 remained naïve. Last, mice in the Aged group were 24-weeks-old and had one eye injected with

303 Ad5CMVempty and the other eye remained naïve; three eyes in this group received an  
304 intracameral injection and one received an intravitreal injection.

305  
306 A masked investigator examined and photodocumented all eyes (N=32) at the 1-, 3-,  
307 and 10-week post-injection time points. The entirety of this data set (128 images at 25X and 32  
308 images at 40X) is available in Appendix 9-16. Following completion, the masked investigator  
309 used the four sequential image pairs from each mouse to assign mice into four groupings based  
310 on common ocular phenotypes.

311 Group 1 (N=4) was characterized by one normal appearing eye, and one eye indicative  
312 of intracameral injection and inflammation (Figure 6, Appendix 9-10). Eyes in this group had  
313 small focal corneal opacities at 1 week, which typically worsened (larger and more opaque)  
314 through 3 weeks and resolved to various degrees by 10 weeks. Most notably, all the affected  
315 eyes in this group had irides with focally “rough” appearing surfaces. When the iris could be  
316 observed through the cloudy cornea, rough appearing irides were present in all eyes at the 10-  
317 week time point. Group 2 (N=4) was characterized by one normal appearing eye, and one eye  
318 indicative of intracameral injection (Figure 6, Appendix 11-12). Eyes in this group have a mild  
319 focal corneal cloudiness at the 1-week time point that resolved over time and have normal  
320 appearing irides. Group 3 (N=4) was characterized by one normal appearing eye, and one eye  
321 indicative of inflammation (Figure 6, Appendix 13-14). Eyes in this group have various degrees  
322 of diffuse corneal cloudiness. When the iris could be observed through the cloudy cornea, rough  
323 appearing irides were present in all eyes at the 10-week time point. Group 4 (N=4) was  
324 characterized by one normal appearing eye, and one eye indicative of intraocular injection and  
325 inflammation (Figure 6, Appendix 15-16). Eyes in this group were characterized by corneal  
326 cloudiness to an extent that visualization of the iris was not possible at the 10-week time point.  
327 Of note, all eyes in this group (including naïve eyes) are larger than the eyes in Groups 1-3.

328

329           At completion, the masked observer (who was masked to treatment and the precise  
330 number of mice per group) assigned Group 1 to Virus (positive control), Group 2 to Buffer,  
331 Group 3 to Intravitreal, and Group 4 to Aged. After unmasking, all 32 eyes were assigned to the  
332 correct group.

333

## 334 **DISCUSSION**

335

336           Although the ophthalmic slit-lamp has long been the primary instrument used in clinical  
337 ophthalmology, its use in research with mice remains uncommon. To our knowledge, we are the  
338 first to thoroughly characterize the sequelae of Ad5 injection in the anterior chamber of mice via  
339 slit-lamp photodocumentation. The results show that injection of the Ad5 vector itself—empty of  
340 any gene therapy inserts—results in changes to the anterior chamber involving transient corneal  
341 opacity and a persistent change in the localization of macrophages on the surface of the iris.  
342 The timeframe of these changes suggests that they are likely to be longer lived than viral gene  
343 expression itself. In describing the appearance and location of these Ad5-responsive  
344 macrophages, our results establish how slit-lamp exams can be used as a bioassay for  
345 inflammatory events in ongoing research using viral vectors.

346

347           The biological events allowing Ad5 to deliver gene therapy constructs to cells has been  
348 extensively studied. Capsid proteins typically mediate cellular internalization of Ad5 via  
349 attachment to the cell surface Coxsackie and adenovirus receptor (CAR; in mice encoded by  
350 the *Cxadr* gene) [28, 29], which is followed by interaction with integrins [30, 31] (Reviewed in  
351 [32-34]). CAR-negative cells are typically described as being poorly transduced by Ad5.  
352 However, several CAR-independent pathways mediating Ad5 transduction are also known. Ad5  
353 can bind with multiple blood factors, such as blood coagulation factor X [35], which helps protect  
354 the adenovirus-complex from attack by the classical complement pathway [36], and facilitates

355 transduction by bridging the virus to cell surface heparin sulfate proteoglycans. In cultured cells,  
356 this mechanism mediated by sulfated glycans has a prominent role in transduction of  
357 hepatocytes, but there are conflicting data regarding its importance to transduction of the mouse  
358 liver by Ad5 in vivo [37] and a species-dependent difference in the influence of human versus  
359 mouse blood coagulation factor X proteins in transduction that complicates the interpretation of  
360 some studies [38]. In macrophages, scavenger receptor A (in mice, encoded by the *Msr1* gene)  
361 is yet another Ad5 receptor [39]. The possibility of additional receptors awaiting characterization  
362 has been implicated by several studies [38, 40, 41]. Once bound to a receptor, Ad5 is  
363 internalized via clathrin-mediated endocytosis [42] or macropinocytosis [43]. After additional  
364 trafficking steps, the viral genome is ultimately inserted into the host nucleus [44]. The viral  
365 genome remains episomal and expresses any cargo gene transcripts until cell division has  
366 diluted the adenovirus to insignificant levels or the immune system has destroyed the  
367 transduced cells.

368  
369         There is also a broad framework for predicting the concurrent immunologic events  
370 associated with the presence of recombinant Ad5 in a tissue. Adenoviruses elicit strong immune  
371 responses, even when they are initially injected into “immune privileged” sites in the eye. Viral  
372 antigens, as well as transgene products, are both capable of activating adaptive immune  
373 responses [45]. Consequently, intraocular injections of Ad5 are followed by intraocular presence  
374 of CD4<sup>+</sup> and CD8<sup>+</sup> T cells and generation of new circulating antibodies [35]. Hamilton and  
375 colleagues previously showed that repeated injections of Ad5 with an empty cassette did not  
376 interfere with subsequent expression of Ad5 with a luciferase reporter, suggesting that the  
377 immune privilege of the eye was likely protecting it from mounting an immune response against  
378 Ad5 [46]. However, since the time of Hamilton’s study it has become increasingly clear that  
379 innate immunity also needs to be considered. Adenoviruses elicit strong innate immune  
380 responses [47, 48]. In cells associated with innate immunity, such as macrophages and

381 dendritic cells, Ad5 interacts with pathogen recognition receptors (PRRs) and stimulates release  
382 of numerous cytokines and chemokines [49]. There are many classes of PRRs, with toll-like  
383 receptors being one of the most studied [50, 51]. Many serotypes of adenovirus interact with  
384 PRRs and the biology of these interactions have been studied with particular intensity at the  
385 ocular surface where they are critically important to adenoviral keratoconjunctivitis [52].  
386 Interestingly, innate responses to Ad5 may be quite broad and evoke pro-inflammatory  
387 responses from “non-immune” cell-types, including epithelial cells [53-55]. For example, cultured  
388 human conjunctival epithelial cells transduced with Ad5 have an upregulation of interleukin-6  
389 (IL-6), interleukin-8 (IL-8), and intracellular adhesion molecule-1 (ICAM-1) [55].

390

391 In the specific context of intraocular Ad5 injections, relevant biological and immunologic  
392 consequences can be predicted, but much remains untested. The Ad5 receptor(s) for tissues  
393 transduced in the anterior chamber have not been defined. Because blood coagulation factor X  
394 seems to not be abundant in aqueous humor [56], the sulfated glycan mediated pathway for  
395 transduction seems unlikely for Ad5 injected directly into the anterior chamber. The sustained  
396 mobilization of clump cells in our experiment could represent either a consequence of direct  
397 macrophage transduction or a secondary response to cytokines produced locally by other  
398 transduced cells. Regardless of how these cells were altered, the important implication is that  
399 the adenovirus led to long lasting changes in the environment of the anterior chamber. Had the  
400 Ad5 we injected been carrying transgene cargo, it would not have been possible to discern  
401 whether phenotypic changes were specific to the cargo gene versus the cargo gene in the  
402 context of the now-altered environment of the anterior chamber. Could different injection  
403 techniques, concentrations, tropism, serotypes, or genetic backgrounds of mice have made a  
404 difference in our findings? Undoubtedly these are relevant variables, but our findings and the  
405 existing literature indicate that cautious interpretations are appropriate—many adenovirus  
406 transduced cells are likely to have an altered expression of cytokines induced by PRR signaling.



407 We suspect that multiple studies have overlooked the clump cell phenotype because they have  
408 primarily used histology as an assay, which in any given section may show few, if any  
409 macrophages altered by Ad5, but that are readily seen with the broader view from slit-lamp  
410 examination. It is also relevant that small changes in cytokines in vivo may be undetectable by  
411 biochemical assays, but still physiologically important.

412  
413         There are some caveats relevant to our study that should be considered. First, we did  
414 not directly measure any cytokines, chemokines, or PRR signaling in Ad5 affected eyes. We  
415 suggest their presence based on the literature and our hypothesis has not been tested. Second,  
416 we have reliably demonstrated that Ad5 injection caused a prolonged mobilization of clump cells  
417 with detailed photodocumentation of the iris that has been correlated with immunolabeling.  
418 However, much remains unknown about the nature of these cells. Visibly, the cells are identical  
419 in appearance and similar in apparent abundance to those we have previously studied in mice  
420 with various forms of iris disease [21, 22]. Several studies have shown that gene expression  
421 changes driven by intraocular injection of Ad5 typically last only 2–7 weeks [13-15]. Assuming a  
422 similar time course occurred in our experiments, the prolonged mobilization of clump cells at 10  
423 weeks following injection predicts that the iris changes caused by Ad5 injection are likely longer  
424 lived than the Ad5 itself. Third, to avoid potential complications from anesthesia and/or rebound  
425 tonometry, our current experiments did not collect any IOP data which might be relevant  
426 considering the localization of F4/80-positive cells deep in the iridocorneal angle and proximity  
427 to the aqueous humor drainage structures.

428  
429         There remains much promise for viral-mediated approaches in studying anterior  
430 chamber physiology using mice [57, 58]. Our current findings describe a caveat of Ad5-  
431 mediated studies involving macrophage mobilization, which we encourage groups to monitor  
432 and consider in their ongoing experiments using adenoviruses.

433

434 ACKNOWLEDGMENTS

435

436 This work was supported in part by Merit Review Award (I01 RX001481) from the U.S.

437 Department of Veterans Affairs RR&D Service and an NIH/NEI Center Support Grant to the

438 University of Iowa (P30 EY025580). AHB was supported by Training Grant Award

439 (T32DK112751). The contents do not represent the views of the U.S. Department of Veterans

440 Affairs or the U.S. Government.

441

## REFERENCES

1. Ritter T, Lehmann M, Volk HD. Improvements in gene therapy: averting the immune response to adenoviral vectors. *BioDrugs* 2002; 16(1):3-10.
2. Vannucci L, Lai M, Chiappesi F, Ceccherini-Nelli L, Pistello M. Viral vectors: a look back and ahead on gene transfer technology. *New Microbiol* 2013; 36(1):1-22.
3. Shirley JL, de Jong YP, Terhorst C, Herzog RW. Immune Responses to Viral Gene Therapy Vectors. *Mol Ther* 2020.
4. Barry MA, Rubin JD, Lu SC. Retargeting adenoviruses for therapeutic applications and vaccines. *FEBS Lett* 2020.
5. Crystal RG. Adenovirus: the first effective in vivo gene delivery vector. *Hum Gene Ther* 2014; 25(1):3-11.
6. Mangel WF, San Martin C. Structure, function and dynamics in adenovirus maturation. *Viruses* 2014; 6(11):4536-70.
7. Robinson CM, Singh G, Lee JY, Dehghan S, Rajaiya J, Liu EB, Yousuf MA, Betensky RA, Jones MS, Dyer DW, Seto D, Chodosh J. Molecular evolution of human adenoviruses. *Sci Rep* 2013; 3:1812.
8. Danthinne X, Imperiale MJ. Production of first generation adenovirus vectors: a review. *Gene Ther* 2000; 7(20):1707-14.
9. Anderson RD, Haskell RE, Xia H, Roessler BJ, Davidson BL. A simple method for the rapid generation of recombinant adenovirus vectors. *Gene Ther* 2000; 7(12):1034-8.
10. Luo J, Deng ZL, Luo X, Tang N, Song WX, Chen J, Sharff KA, Luu HH, Haydon RC, Kinzler KW, Vogelstein B, He TC. A protocol for rapid generation of recombinant adenoviruses using the AdEasy system. *Nat Protoc* 2007; 2(5):1236-47.
11. Bennett J, Wilson J, Sun D, Forbes B, Maguire A. Adenovirus vector-mediated in vivo gene transfer into adult murine retina. *Invest Ophthalmol Vis Sci* 1994; 35(5):2535-42.
12. Mashhour B, Couton D, Perricaudet M, Briand P. In vivo adenovirus-mediated gene transfer into ocular tissues. *Gene Ther* 1994; 1(2):122-6.
13. Budenz DL, Bennett J, Alonso L, Maguire A. In vivo gene transfer into murine corneal endothelial and trabecular meshwork cells. *Invest Ophthalmol Vis Sci* 1995; 36(11):2211-5.
14. Millar JC, Pang IH, Wang WH, Wang Y, Clark AF. Effect of immunomodulation with anti-CD40L antibody on adenoviral-mediated transgene expression in mouse anterior segment. *Mol Vis* 2008; 14:10-9.
15. Hamilton MM, Byrnes GA, Gall JG, Brough DE, King CR, Wei LL. Alternate serotype adenovector provides long-term therapeutic gene expression in the eye. *Mol Vis* 2008; 14:2535-46.
16. Li G, Gonzalez P, Camras LJ, Navarro I, Qiu J, Challa P, Stamer WD. Optimizing gene transfer to conventional outflow cells in living mouse eyes. *Exp Eye Res* 2013; 109:8-16.
17. Ueyama K, Mori K, Shoji T, Omata H, Gehlbach PL, Brough DE, Wei LL, Yoneya S. Ocular localization and transduction by adenoviral vectors are serotype-dependent and can be modified by inclusion of RGD fiber modifications. *PLoS One* 2014; 9(9):e108071.
18. Sweigard JH, Cashman SM, Kumar-Singh R. Adenovirus vectors targeting distinct cell types in the retina. *Invest Ophthalmol Vis Sci* 2010; 51(4):2219-28.
19. Evans RK, Nawrocki DK, Isopi LA, Williams DM, Casimiro DR, Chin S, Chen M, Zhu DM, Shiver JW, Volkin DB. Development of stable liquid formulations for adenovirus-based vaccines. *Journal of pharmaceutical sciences* 2004; 93(10):2458-75.
20. Meyer KJ, Anderson MG. Genetic modifiers as relevant biological variables of eye disorders. *Human molecular genetics* 2017; 26(R1):R58-r67.

21. Anderson MG, Libby RT, Mao M, Cosma IM, Wilson LA, Smith RS, John SW. Genetic context determines susceptibility to intraocular pressure elevation in a mouse pigmented glaucoma. *BMC Biol* 2006; 4:20.
22. Anderson MG, Hawes NL, Trantow CM, Chang B, John SW. Iris phenotypes and pigment dispersion caused by genes influencing pigmentation. *Pigment Cell Melanoma Res* 2008; 21(5):565-78.
23. Marneros AG, Olsen BR. Age-dependent iris abnormalities in collagen XVIII/endostatin deficient mice with similarities to human pigment dispersion syndrome. *Invest Ophthalmol Vis Sci* 2003; 44(6):2367-72.
24. Wobmann PR, Fine BS. The clump cells of Koganei. A light and electron microscopic study. *Am J Ophthalmol* 1972; 73(1):90-101.
25. Chinnery HR, McMennamin PG, Dando SJ. Macrophage physiology in the eye. *Pflugers Arch* 2017; 469(3-4):501-15.
26. Dos Anjos Cassado A. F4/80 as a Major Macrophage Marker: The Case of the Peritoneum and Spleen. *Results Probl Cell Differ* 2017; 62:161-79.
27. McMennamin PG, Crewe J, Morrison S, Holt PG. Immunomorphologic studies of macrophages and MHC class II-positive dendritic cells in the iris and ciliary body of the rat, mouse, and human eye. *Invest Ophthalmol Vis Sci* 1994; 35(8):3234-50.
28. Bergelson JM, Cunningham JA, Droguett G, Kurt-Jones EA, Krithivas A, Hong JS, Horwitz MS, Crowell RL, Finberg RW. Isolation of a common receptor for Coxsackie B viruses and adenoviruses 2 and 5. *Science* 1997; 275(5304):1320-3.
29. Tomko RP, Xu R, Philipson L. HCAR and MCAR: the human and mouse cellular receptors for subgroup C adenoviruses and group B coxsackieviruses. *Proc Natl Acad Sci U S A* 1997; 94(7):3352-6.
30. Nakano MY, Boucke K, Suomalainen M, Stidwill RP, Greber UF. The first step of adenovirus type 2 disassembly occurs at the cell surface, independently of endocytosis and escape to the cytosol. *J Virol* 2000; 74(15):7085-95.
31. Wickham TJ, Mathias P, Cheresch DA, Nemerow GR. Integrins alpha v beta 3 and alpha v beta 5 promote adenovirus internalization but not virus attachment. *Cell* 1993; 73(2):309-19.
32. Stepanenko AA, Chekhonin VP. Tropism and transduction of oncolytic adenovirus 5 vectors in cancer therapy: Focus on fiber chimerism and mosaicism, hexon and pIX. *Virus Res* 2018; 257:40-51.
33. Nemerow GR, Stewart PL. Insights into Adenovirus Uncoating from Interactions with Integrins and Mediators of Host Immunity. *Viruses* 2016; 8(12).
34. Zhang Y, Bergelson JM. Adenovirus receptors. *J Virol* 2005; 79(19):12125-31.
35. Waddington SN, McVey JH, Bhella D, Parker AL, Barker K, Atoda H, Pink R, Buckley SM, Greig JA, Denby L, Custers J, Morita T, Francischetti IM, Monteiro RQ, Barouch DH, van Rooijen N, Napoli C, Havenga MJ, Nicklin SA, Baker AH. Adenovirus serotype 5 hexon mediates liver gene transfer. *Cell* 2008; 132(3):397-409.
36. Xu Z, Qiu Q, Tian J, Smith JS, Conenello GM, Morita T, Byrnes AP. Coagulation factor X shields adenovirus type 5 from attack by natural antibodies and complement. *Nat Med* 2013; 19(4):452-7.
37. Zaiss AK, Foley EM, Lawrence R, Schneider LS, Hoveida H, Secret P, Catapang AB, Yamaguchi Y, Alemany R, Shayakhmetov DM, Esko JD, Herschman HR. Hepatocyte Heparan Sulfate Is Required for Adeno-Associated Virus 2 but Dispensable for Adenovirus 5 Liver Transduction In Vivo. *J Virol* 2016; 90(1):412-20.
38. Zaiss AK, Lawrence R, Elashoff D, Esko JD, Herschman HR. Differential effects of murine and human factor X on adenovirus transduction via cell-surface heparan sulfate. *J Biol Chem* 2011; 286(28):24535-43.
39. Haisma HJ, Boesjes M, Beerens AM, van der Strate BW, Curiel DT, Pluddemann A, Gordon S, Bellu AR. Scavenger receptor A: a new route for adenovirus 5. *Mol Pharm* 2009; 6(2):366-74.

40. Lopez-Gordo E, Dospoly A, Duffy MR, Coughlan L, Bradshaw AC, White KM, Denby L, Nicklin SA, Baker AH. Defining a Novel Role for the Coxsackievirus and Adenovirus Receptor in Human Adenovirus Serotype 5 Transduction In Vitro in the Presence of Mouse Serum. *J Virol* 2017; 91(12).
41. Alemany R, Curiel DT. CAR-binding ablation does not change biodistribution and toxicity of adenoviral vectors. *Gene Ther* 2001; 8(17):1347-53.
42. Meier O, Greber UF. Adenovirus endocytosis. *J Gene Med* 2004; 6 Suppl 1:S152-63.
43. Xie J, Chiang L, Contreras J, Wu K, Garner JA, Medina-Kauwe L, Hamm-Alvarez SF. Novel fiber-dependent entry mechanism for adenovirus serotype 5 in lacrimal acini. *J Virol* 2006; 80(23):11833-51.
44. Leopold PL, Crystal RG. Intracellular trafficking of adenovirus: many means to many ends. *Adv Drug Deliv Rev* 2007; 59(8):810-21.
45. Yang Y, Jooss KU, Su Q, Ertl HC, Wilson JM. Immune responses to viral antigens versus transgene product in the elimination of recombinant adenovirus-infected hepatocytes in vivo. *Gene Ther* 1996; 3(2):137-44.
46. Hamilton MM, Brough DE, McVey D, Bruder JT, King CR, Wei LL. Repeated administration of adenovector in the eye results in efficient gene delivery. *Invest Ophthalmol Vis Sci* 2006; 47(1):299-305.
47. Atasheva S, Yao J, Shayakhmetov DM. Innate immunity to adenovirus: lessons from mice. *FEBS Lett* 2019; 593(24):3461-83.
48. Hartman ZC, Appledorn DM, Amalfitano A. Adenovirus vector induced innate immune responses: impact upon efficacy and toxicity in gene therapy and vaccine applications. *Virus Res* 2008; 132(1-2):1-14.
49. Zhu J, Huang X, Yang Y. Innate immune response to adenoviral vectors is mediated by both Toll-like receptor-dependent and -independent pathways. *J Virol* 2007; 81(7):3170-80.
50. Hartman ZC, Black EP, Amalfitano A. Adenoviral infection induces a multi-faceted innate cellular immune response that is mediated by the toll-like receptor pathway in A549 cells. *Virology* 2007; 358(2):357-72.
51. Hensley SE, Amalfitano A. Toll-like receptors impact on safety and efficacy of gene transfer vectors. *Mol Ther* 2007; 15(8):1417-22.
52. Pennington MR, Saha A, Painter DF, Gavazzi C, Ismail AM, Zhou X, Chodosh J, Rajaiya J. Disparate Entry of Adenoviruses Dictates Differential Innate Immune Responses on the Ocular Surface. *Microorganisms* 2019; 7(9).
53. Tamanini A, Nicolis E, Bonizzato A, Bezzerri V, Melotti P, Assael BM, Cabrini G. Interaction of adenovirus type 5 fiber with the coxsackievirus and adenovirus receptor activates inflammatory response in human respiratory cells. *J Virol* 2006; 80(22):11241-54.
54. Tibbles LA, Spurrell JC, Bowen GP, Liu Q, Lam M, Zaiss AK, Robbins SM, Hollenberg MD, Wickham TJ, Muruve DA. Activation of p38 and ERK signaling during adenovirus vector cell entry lead to expression of the C-X-C chemokine IP-10. *J Virol* 2002; 76(4):1559-68.
55. Tsubota K, Inoue H, Ando K, Ono M, Yoshino K, Saito I. Adenovirus-mediated gene transfer to the ocular surface epithelium. *Exp Eye Res* 1998; 67(5):531-8.
56. Liu P, Thomson BR, Khalatyan N, Feng L, Liu X, Savas JN, Quaggin SE, Jin J. Selective permeability of mouse blood-aqueous barrier as determined by (15)N-heavy isotope tracing and mass spectrometry. *Proc Natl Acad Sci U S A* 2018; 115(36):9032-7.
57. Dang Y, Loewen R, Parikh HA, Roy P, Loewen NA. Gene transfer to the outflow tract. *Exp Eye Res* 2017; 158:73-84.
58. Pang IH, Millar JC, Clark AF. Elevation of intraocular pressure in rodents using viral vectors targeting the trabecular meshwork. *Exp Eye Res* 2015; 141:33-41.

## FIGURE LEGENDS

**Figure 1.** Slit-lamp images from a mouse in the Naïve group. Images from the left and right eyes of a single mouse at progressive ages showing normal appearance of the anterior chamber. **A-B:** Pre-treatment images were collected in mice that were 12.5 weeks old. The cornea is clear, and the iris vessels are the main notable feature of the iris. With subsequent aging in these unmanipulated mice, the same healthy appearance is maintained at **C-D:** 1 week, **E-F:** 3 weeks, and **G-H:** 10 weeks following initiation of the experiment. See Figure 4A for a different view of the same eye and time point shown in panel G. Images at 25X magnification were collected by an investigator who was masked to treatment status at the time they were photographed.

Figure 1

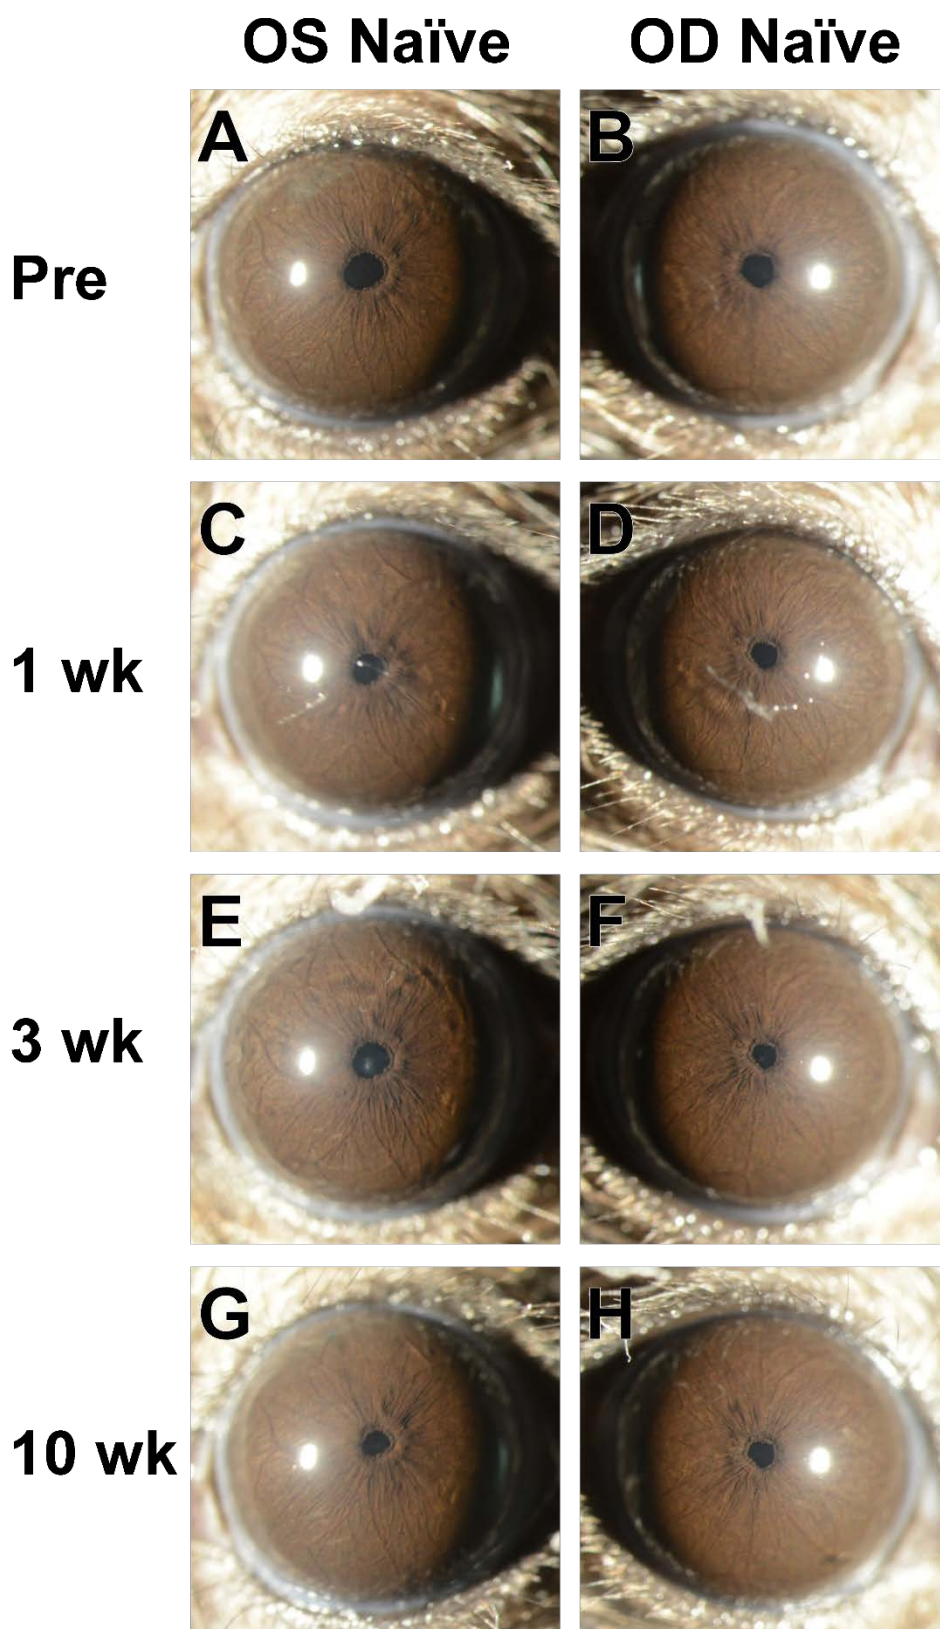

**Figure 2.** Slit-lamp images from a mouse in the Saline group. Images from the left and right eyes of a single mouse at progressive ages showing consequences of intraocular injection in the left eye and normal appearance of the anterior chamber in the right eye. **A-B:** Pre-treatment images were collected in mice that were 12.5 weeks old. The left eye was subsequently injected with BSS. **C-D:** At the 1-week time point, the injected left eye has a mild corneal opacity where the needle had been inserted and a small lenticular opacity; the naïve right eye has a normal appearance. **E-F:** At the 3-week and **G-H:** 10-week time points, the corneal opacity in the injected left eye became progressively less severe and the lenticular opacity appeared to be unchanged; meanwhile, the naïve right eye maintained a normal appearance. See Figure 4C for a different view of the same eye and time point shown in panel G. Images at 25X magnification were collected by an investigator who was masked to treatment status at the time they were photographed.



Figure 2

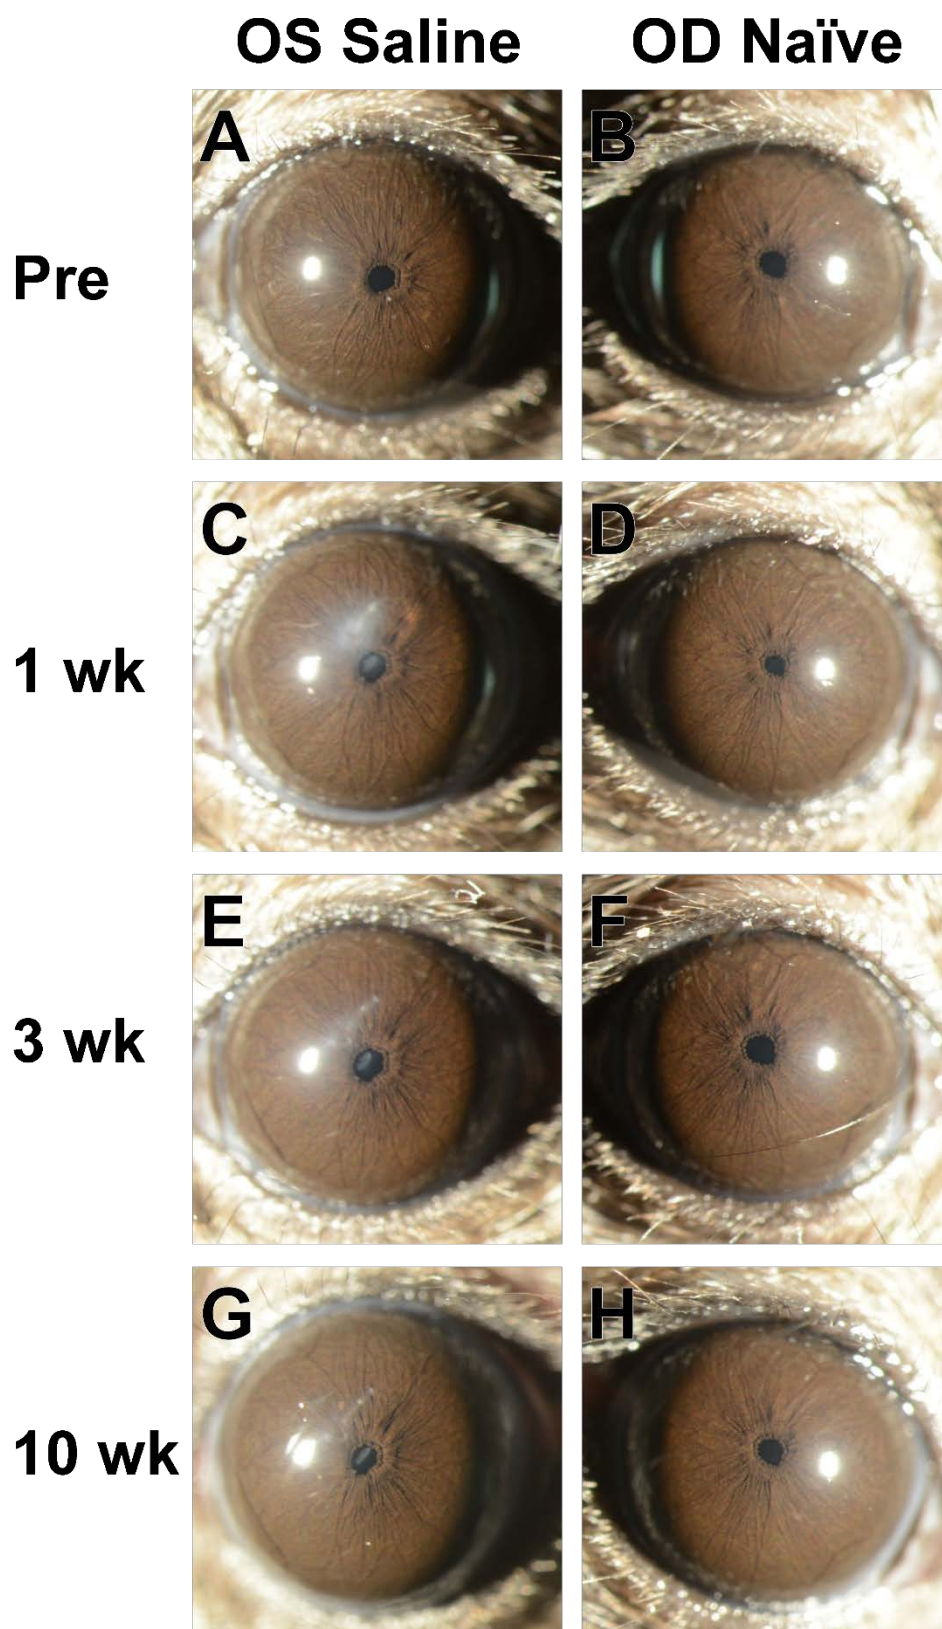

**Figure 3.** Slit-lamp images from a mouse in the Virus group. Images from the left and right eyes of a single mouse at progressive ages showing consequences of intraocular Ad5 injection in the left eye and normal appearance of the anterior chamber in the right eye. **A-B:** Pre-treatment images were collected in mice that were 12.5 weeks old. The left eye subsequently received an intraocular injection of Ad5. **C-D:** At the 1-week time point, the injected left eye has several areas showing mild corneal opacity and lenticular opacity; the naïve right eye has a normal appearance. **E-F:** At the 3-week time point, the corneal opacity of the injected left eye had become significantly more severe, blocking visualization of the remainder of the anterior chamber; the uninjected right eye remained normal in appearance. **G-H:** At the 10-week time point, the corneal opacity in the injected left eye lessened in severity and where areas of the iris can be viewed, rough appearing areas are present. The naïve right eye maintained a normal appearance Note that the apparent cloudiness of the cornea is also dependent on the reflectivity of the light source, see Figure 4E for a different view of the same eye and time point shown in panel G. Images at 25X magnification were collected by an investigator who was masked to treatment status at the time they were photographed.

Figure 3

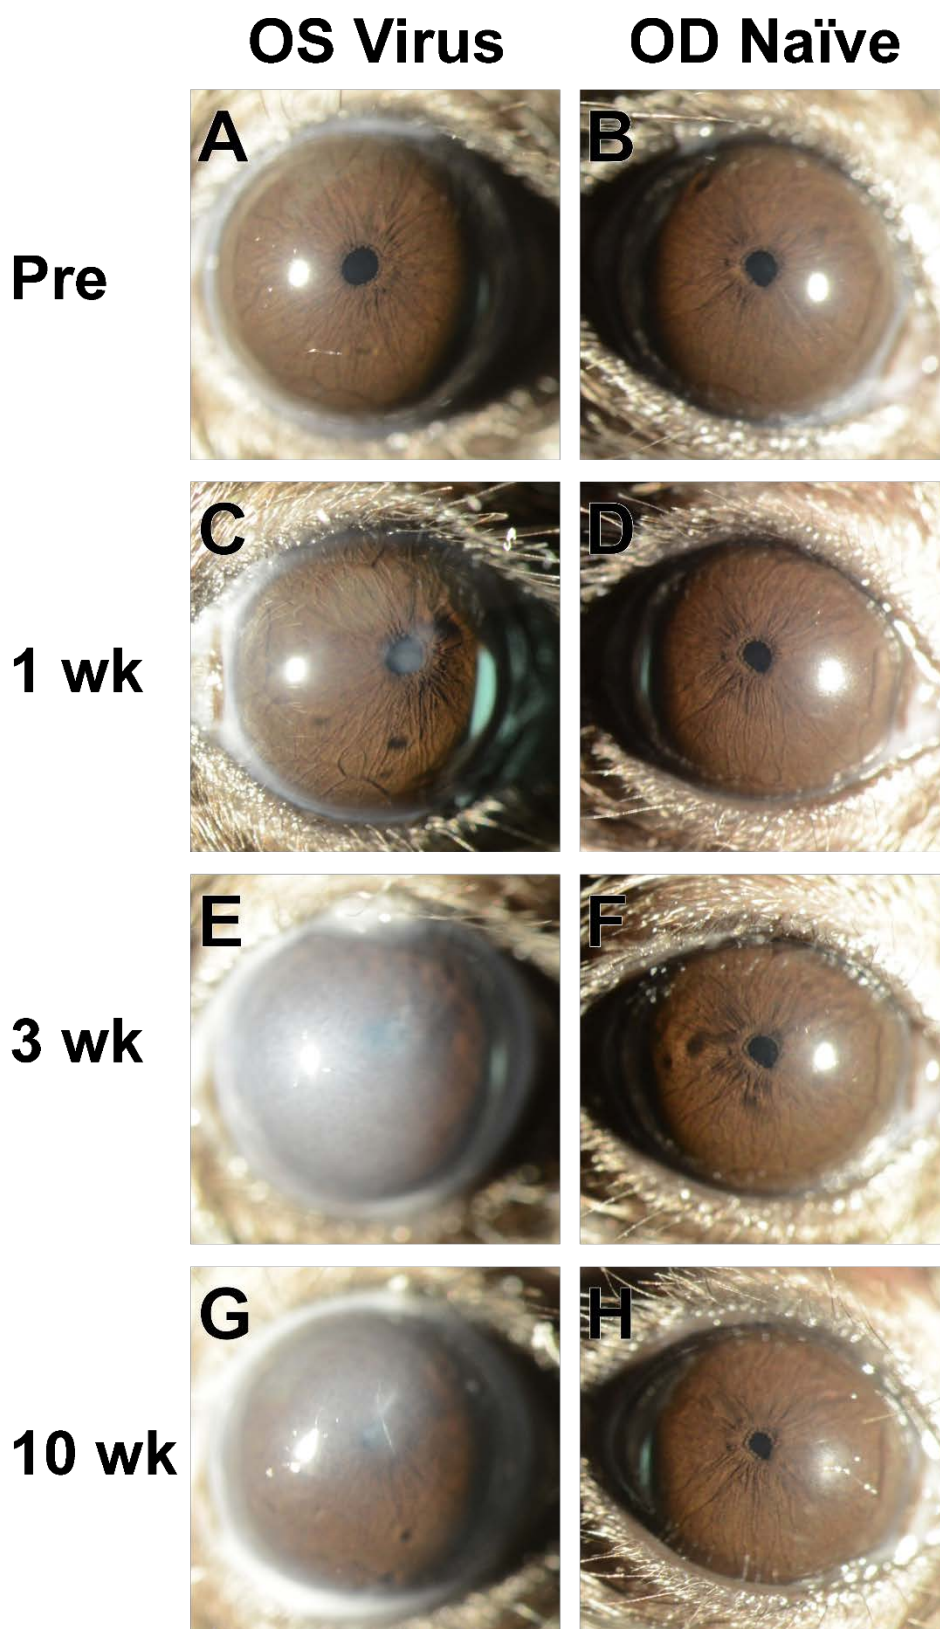

**Figure 4.** High-magnification slit-lamp images showing the unique presence of clump cells in Ad5 injected eyes. Images are from the same eyes shown at the 10-week time point in Figures 1-3, but photographed at a higher magnification and with the mouse held at a more severe angle with respect to the light source. A digital enlargement of the same areas immediately to the left of each pupil are shown in the right-hand column. **A-B:** The iris of mice in the Naïve group retained a normal morphology with no visible clump cells throughout the study. The same eye is also shown in Figure 1G. **C-D:** The iris of mice in the Saline group also maintained a normal morphology lacking visible clump cells. A lenticular opacity is also visible. The same eye is also shown in Figure 2G. **E-F:** Unique to only treated eyes of the Virus group, intraocular injection of Ad5 led to a notable accumulation of clump cells (*white arrow*, several additional also visible but unmarked) on the surface of the iris. Lenticular and corneal opacity is also apparent. The same eye is also shown in Figure 3G. Images at 40X magnification were collected by an investigator who was masked to treatment status at the time they were photographed.

Figure 4

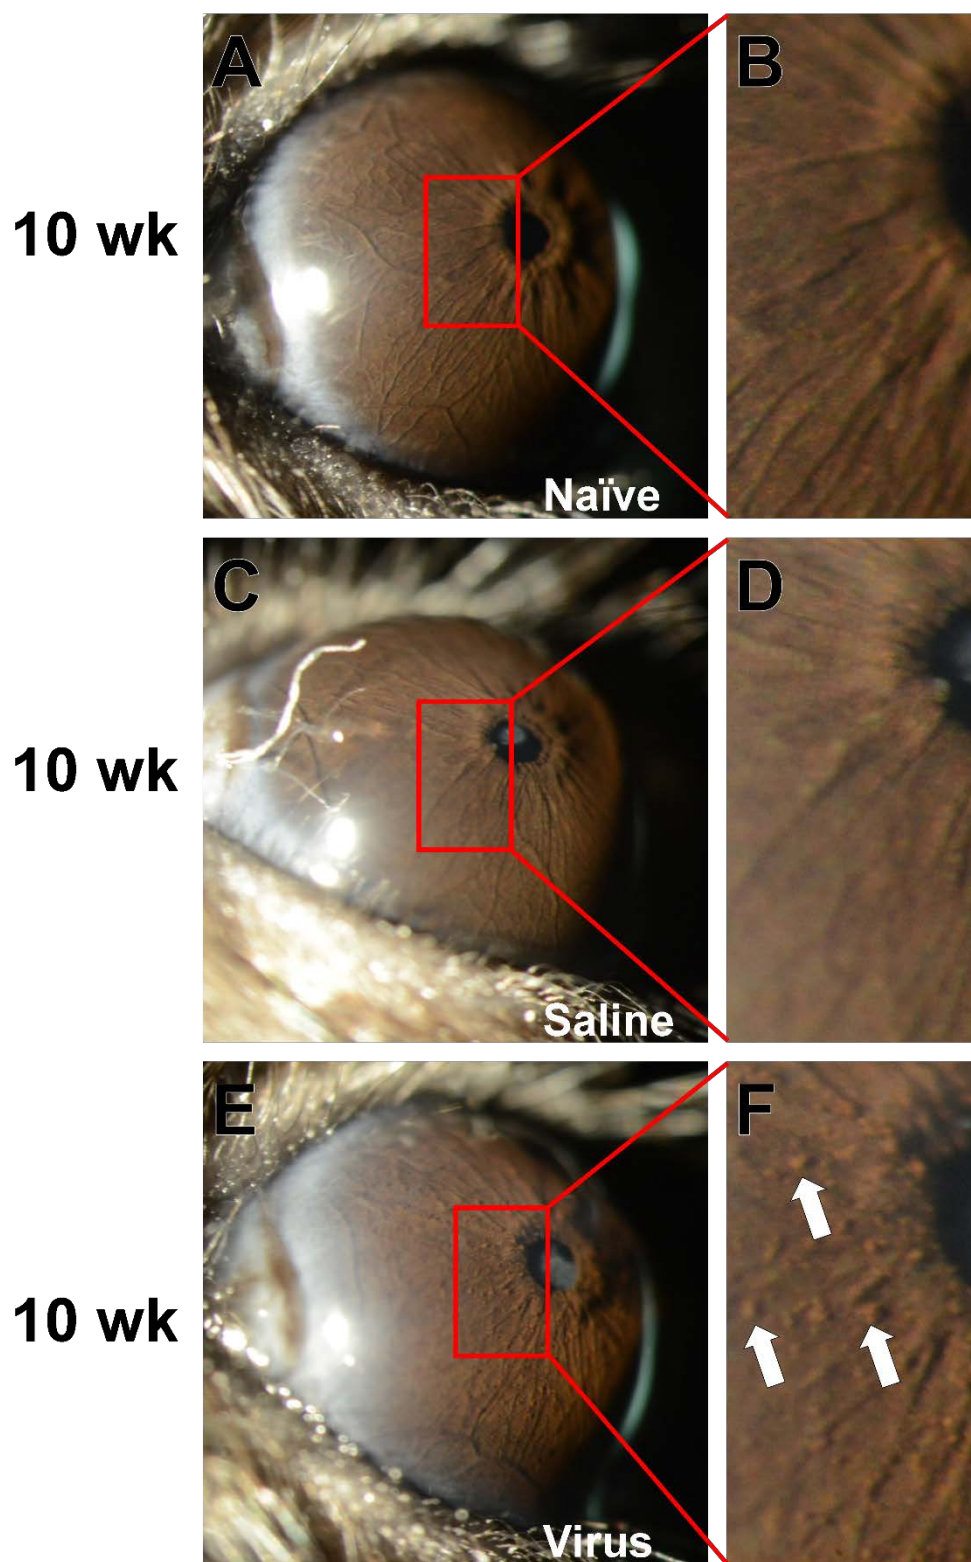

**Figure 5.** Localization of the macrophage marker F4/80 to clump cells in Ad5-injected eyes.

Fluorescent and light micrographs of eyes immunostained with F4/80 and counterstained with DAPI (nuclear stain) in treated eyes of mice from the Saline cohort (left column) compared to those of mice from the Virus cohort (right column). **A-B:** The central cornea shows a similar localization and prevalence of F4/80<sup>+</sup> cells. **C-F:** the mid-peripheral iris and **G-J:** iridocorneal angle show an increased prevalence of F4/80<sup>+</sup> cells localized along the anterior iris stroma, matching the location of clump cells visualized via slit-lamp exam (*white arrowheads*). Note that F4/80<sup>+</sup> cells also appear to be pigment laden, which is an additional feature ascribed to clump cells. F4/80<sup>+</sup> cells are also prominent in the posterior iris pigmented epithelium and iridocorneal angle of Ad5-injected eyes. Notation of the prominent intraocular structures are indicated (*white text*) in panel G. Scale bar = 100  $\mu$ m for (A-F) and (G-J).

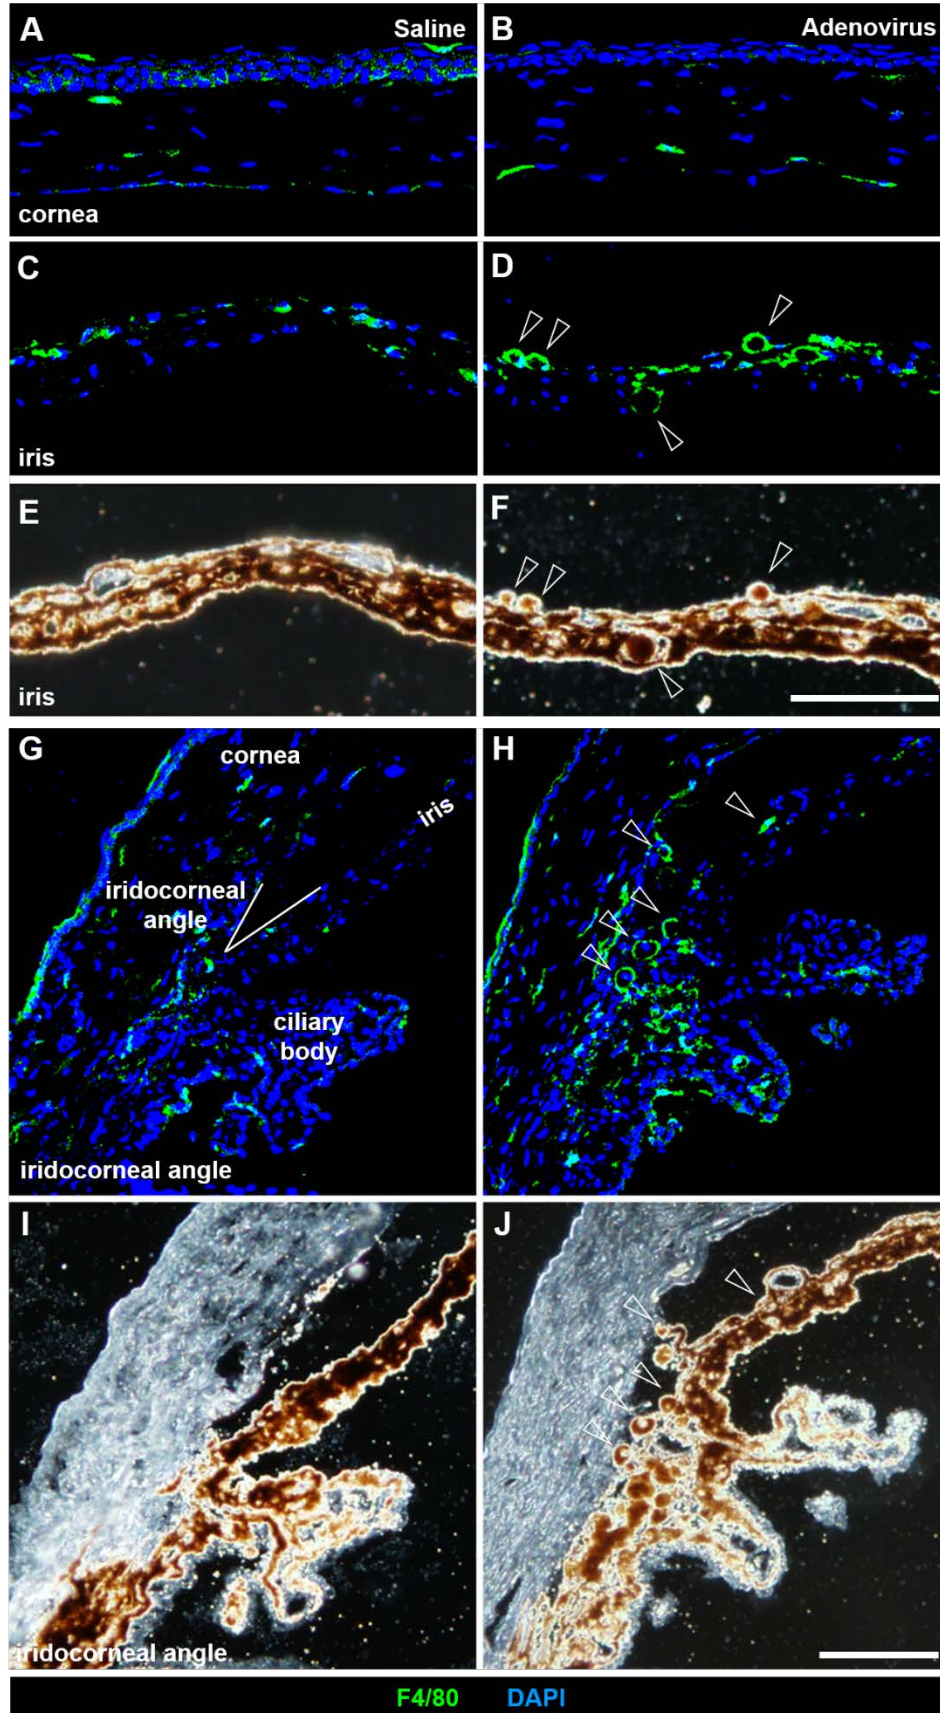

**Figure 6.** High-magnification slit-lamp images showing the results of experimental iterations for Ad5 intraocular injections. Images are from the same eyes shown at the 10-week time point in Appendices 9, 11, 13, and 15, but photographed at a higher magnification and with the mouse held at a more severe angle with respect to the light source. Images at 40X magnification were collected by an investigator who was masked to treatment status at the time they were photographed. A digital enlargement of the same areas immediately to the left of each pupil are shown in the right-hand column. **A-B:** In the Virus positive control group, anterior chamber injection of Ad5 led to a notable accumulation of clump cells (*white arrow*, several additional also visible but unmarked) on the surface of the iris, replicating the experiment shown in Figure 4E-F. **C-D:** The iris of mice in the Buffer group (anterior chamber injection of A195 buffer) maintained a normal morphology throughout the study lacking visible clump cells. **E-F:** In the Intravitreal group, an intravitreal injection of Ad5 led to a notable accumulation of clump cells (*white arrow*, several additional also visible but unmarked) on the surface of the iris. **G-H:** The eyes of the mice in the Aged group that received an intraocular injection of Ad5 all had corneal cloudiness at the 10-week time point that precluded visualization of the iris.



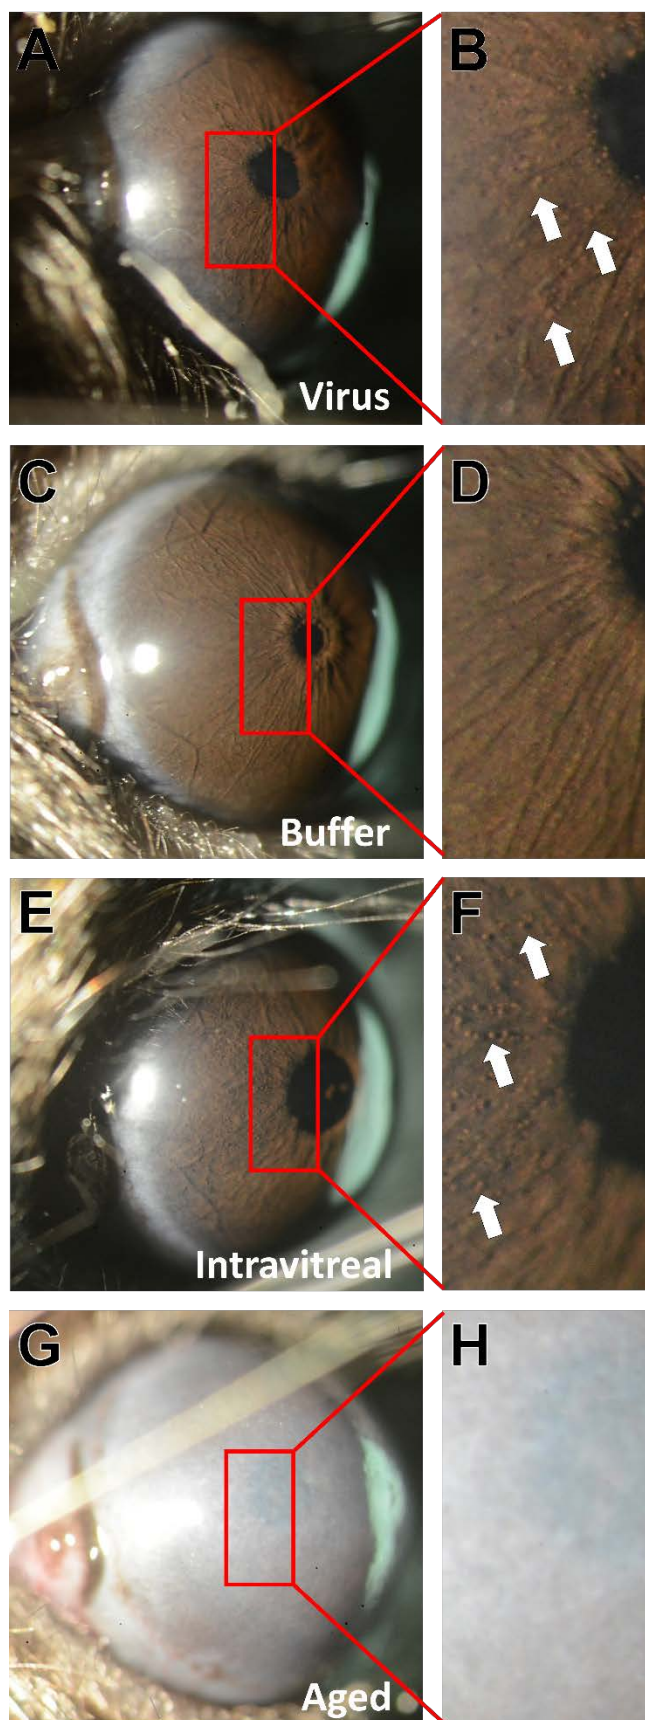

**Supplementary Figure 1.** Persistence of clump cells in the iridocorneal angle of eyes following intraocular Ad5 injection. Light micrographs collected from opposite poles (*left vs. right column*) of hematoxylin and eosin-stained histological sections from the same eye shown at (A–B) 200X and (C–D) 400X total magnification. Areas within inset boxes (*top row*) are show at higher magnification below (*bottom row*). Note that despite some variability, there is a persistent localization of clump cells deep within the iridocorneal angle with proximity to the drainage structures. Scale bar = 50  $\mu$ m.

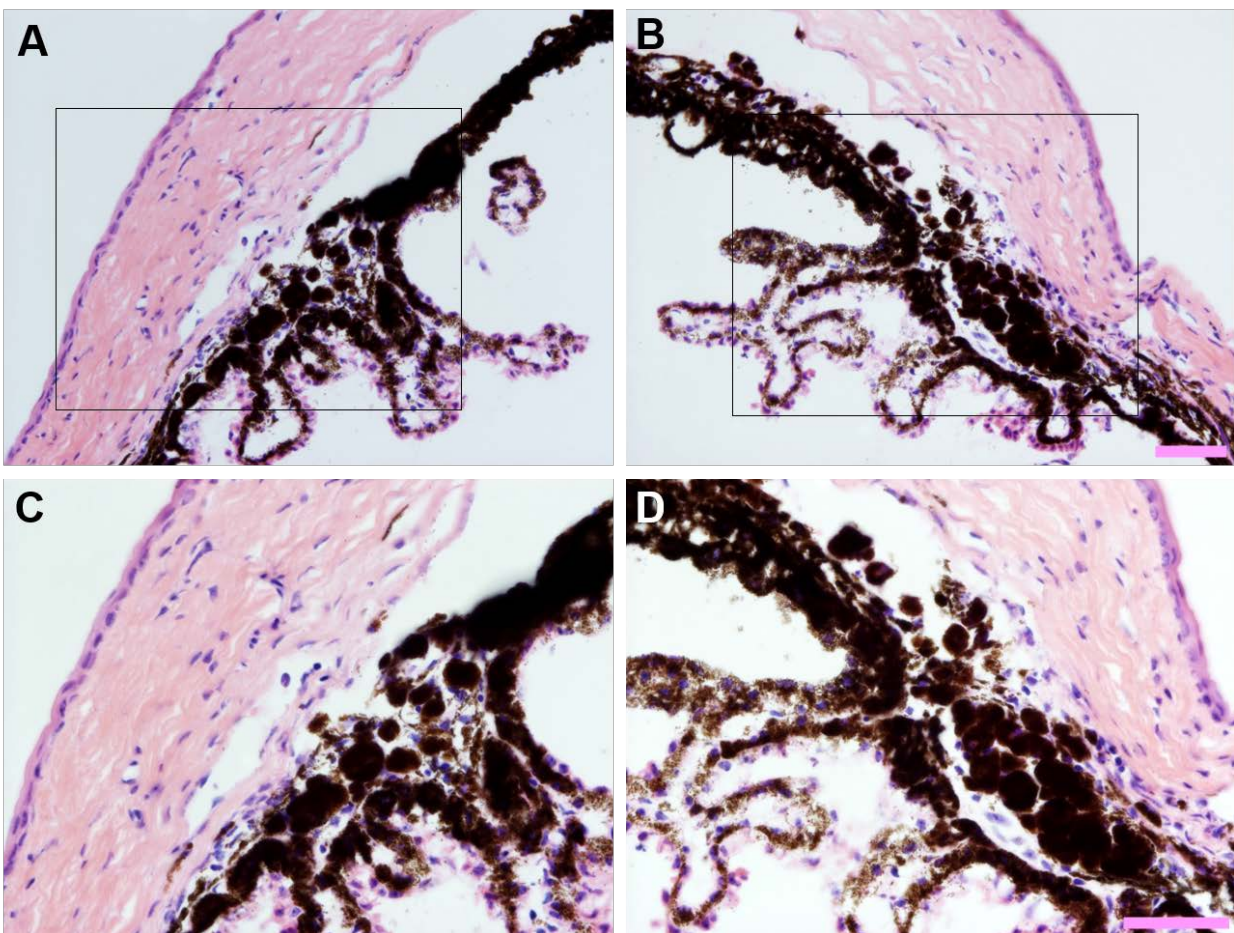

## APPENDICES

**Appendix 1.** Complete dataset of 25X slit-lamp images from three mice at multiple ages which were not able to be categorized in the masked study because of severe corneal opacity.

**Appendix 2.** Complete dataset of 40X slit-lamp images from three mice at the 10-week time point which were not able to be categorized in the masked study because of severe corneal opacity.

**Appendix 3.** Complete dataset of 25X slit-lamp images from eight mice at multiple ages assigned to the Virus group in the masked study.

**Appendix 4.** Complete dataset of 40X slit-lamp images from eight mice at the 10-week time point assigned to the Virus group in the masked study.

**Appendix 5.** Complete dataset of 25X slit-lamp images from nine mice at multiple ages assigned to the Saline group in the masked study.

**Appendix 6.** Complete dataset of 40X slit-lamp images from nine mice at the 10-week time point assigned to the Saline group in the masked study.

**Appendix 7.** Complete dataset of 25X slit-lamp images from six mice at multiple ages assigned to the Naïve group in the masked study.

**Appendix 8.** Complete dataset of 40X slit-lamp images from six mice at the 10-week time point assigned to the Naïve group in the masked study.

**Appendix 9.** Complete dataset of 25X slit-lamp images from four mice at multiple ages assigned to the Virus positive group in the masked study of experimental iterations.

**Appendix 10.** Complete dataset of 40X slit-lamp images from four mice at the 10-week time point assigned to the Virus positive group in the masked study of experimental iterations.

**Appendix 11.** Complete dataset of 25X slit-lamp images from four mice at multiple ages assigned to the Buffer group in the masked study of experimental iterations.

**Appendix 12.** Complete dataset of 40X slit-lamp images from four mice at the 10-week time point assigned to the Buffer group in the masked study of experimental iterations.

**Appendix 13.** Complete dataset of 25X slit-lamp images from four mice at multiple ages assigned to the Intravitreal group in the masked study of experimental iterations.

**Appendix 14.** Complete dataset of 40X slit-lamp images from four mice at the 10-week time point assigned to the Intravitreal group in the masked study of experimental iterations.

**Appendix 15.** Complete dataset of 25X slit-lamp images from four mice at multiple ages assigned to the Aged group in the masked study of experimental iterations.

**Appendix 16.** Complete dataset of 40X slit-lamp images from four mice at the 10-week time point assigned to the Aged group in the masked study of experimental iterations.
